# Supplementary material for: Genotypic comparison of Pantoea agglomerans plant and clinical strains
Source: PubMed Central journal article supplement (PMC2764716; doi:10.1186/1471-2180-9-204), 2009-09-22
Supplement: 1471-2180-9-204-S1.pdf [file 1471-2180-9-204-S1.pdf]

**TABLE S1.** Strains used in this study (<sup>T</sup>=type strain).

| Strain designation         | Received as                                | Origin         | Host                                            | Organ             | Properties    | Other designations, notes        | References |
|----------------------------|--------------------------------------------|----------------|-------------------------------------------------|-------------------|---------------|----------------------------------|------------|
| <b><i>Brenneria</i></b>    |                                            |                |                                                 |                   |               |                                  |            |
| LMG 2694 <sup>T</sup>      | <i>B. nigrifluens</i>                      | United States  | <i>Juglans regia</i>                            | Bark canker       | Phytopathogen | Type strain                      | [1]        |
| LMG 2709 <sup>T</sup>      | <i>B. rubrifaciens</i>                     | United States  | <i>Juglans regia</i>                            | -                 | Phytopathogen | Type strain                      | [2]        |
| <b><i>Enterobacter</i></b> |                                            |                |                                                 |                   |               |                                  |            |
| LMG 2693 <sup>T</sup>      | <i>E. cancerogenus</i>                     | Czech Republic | <i>Populus canadensis</i> cv. <i>Regenerata</i> | -                 | Phytopathogen | Type strain                      | [3]        |
| LMG 5336                   | <i>E. agglomerans</i>                      | United States  | -                                               | -                 | Clinical      | <i>P. agglomerans</i> ATCC 29904 |            |
| LMG 5337                   | <i>E. agglomerans</i>                      | United States  | Human                                           | Intervenous fluid | Clinical      | <i>P. agglomerans</i> ATCC 29915 |            |
| LMG 5339                   | <i>E. agglomerans</i>                      | United States  | Chicken                                         | Liver             | Veterinarial  | <i>P. agglomerans</i> ATCC 29917 |            |
| LMG 5341                   | <i>E. agglomerans</i>                      | United States  | Human                                           | -                 | Clinical      | <i>P. agglomerans</i> ATCC 29919 |            |
| LMG 5345                   | <i>E. agglomerans</i>                      | United States  | Human                                           | -                 | Clinical      | <i>P. agglomerans</i> ATCC 29923 |            |
| <b><i>Erwinia</i></b>      |                                            |                |                                                 |                   |               |                                  |            |
| CFBP 1232 <sup>T</sup>     | <i>E. amylovora</i>                        | United Kingdom | <i>Pyrus communis</i>                           | -                 | Phytopathogen | Type strain                      | [4]        |
| CFBP 4342                  | <i>E. herbicola</i> pv. <i>gypsophilae</i> | Netherlands    | <i>Gypsophila paniculata</i>                    | Plant gall        | Phytopathogen |                                  |            |
| DSM 12163 <sup>T</sup>     | <i>E. pyrifoliae</i>                       | South Korea    | <i>Pyrus pyrifolia</i>                          | -                 | Clinical      | Type strain                      | [5]        |
| Ea 273                     | <i>E. amylovora</i>                        | United States  | <i>Malus pumila</i>                             | Apple             | Phytopathogen | ATCC 49946                       | [6, 7]     |
| <b><i>Pantoea</i></b>      |                                            |                |                                                 |                   |               |                                  |            |
| ACW 55802                  | <i>P. agglomerans</i>                      | Switzerland    | Apple tree                                      | -                 | Environmental |                                  |            |
| ACW 55899                  | <i>P. agglomerans</i>                      | Switzerland    | Apple tree                                      | -                 | Environmental |                                  |            |
| ATCC 27981                 | <i>P. agglomerans</i>                      | United States  | Human                                           | Sputum            | Clinical      | CDC 865-74                       |            |
| ATCC 27982                 | <i>P. agglomerans</i>                      | United States  | Human                                           | IV fluid          | Clinical      | CDC 2214-72                      |            |
| ATCC 27985                 | <i>P. agglomerans</i>                      | United States  | Human                                           | N/A               | Clinical      | CDC 811-75                       |            |
| ATCC 27987                 | <i>P. agglomerans</i>                      | United States  | Human                                           | Ear               | Clinical      | CDC 1400-74                      |            |

|            |                       |               |                     |                             |               |                                                                      |      |
|------------|-----------------------|---------------|---------------------|-----------------------------|---------------|----------------------------------------------------------------------|------|
| ATCC 27988 | <i>P. agglomerans</i> | United States | Human               | Urine                       | Clinical      | CDC 1377-71                                                          |      |
| ATCC 27989 | <i>P. agglomerans</i> | United States | Human               | Sputum                      | Clinical      | CDC 1300-74                                                          |      |
| ATCC 27990 | <i>P. agglomerans</i> | United States | Human               | -                           | Clinical      | CDC 1134-72                                                          |      |
| ATCC 27991 | <i>P. agglomerans</i> | United States | Human               | Eye drainage                | Clinical      | CDC 358-74                                                           |      |
| ATCC 27992 | <i>P. agglomerans</i> | United States | Human               | -                           | Clinical      | CDC 1269-74                                                          |      |
| ATCC 27993 | <i>P. agglomerans</i> | United States | Human               | Blood                       | Clinical      | CDC 4-74                                                             |      |
| ATCC 27994 | <i>P. agglomerans</i> | United States | Human               | -                           | Clinical      | CDC 3072-74                                                          |      |
| ATCC 27995 | <i>P. agglomerans</i> | United States | Human               | -                           | Clinical      | CDC 4854-73                                                          |      |
| ATCC 27996 | <i>P. agglomerans</i> | United States | Insect              | -                           | Environmental | CDC 5474-71                                                          |      |
| ATCC 27998 | <i>P. agglomerans</i> | United States | Human               | Trachea                     | Clinical      | CDC 1741-71                                                          |      |
| ATCC 29001 | <i>P. agglomerans</i> | United States | Human               | Prostate                    | Clinical      | CDC 164-75                                                           |      |
| ATCC 29918 | <i>P. agglomerans</i> | United States | Human               | -                           | Clinical      | CDC 4388-71                                                          |      |
| C9-1       | <i>P. agglomerans</i> | United States | <i>Malus malus</i>  | Stem                        | Biocontrol    | BlightBan C9-1™                                                      | [8]  |
| CECT 4842  | <i>P. agglomerans</i> | Sweden        | Industrial          | Paper mill process<br>water | Environmental |                                                                      |      |
| CIP 102343 | <i>P. agglomerans</i> | Algeria       | Human               | Urine                       | Clinical      |                                                                      |      |
| CIP 102701 | <i>P. agglomerans</i> | France        | Human               | Ear                         | Clinical      |                                                                      |      |
| CIP 82.100 | <i>P. agglomerans</i> | Canada        | Cereal plant        | -                           | Environmental | ATCC 33243 <sup>T</sup> , type strain of<br><i>Erwinia herbicola</i> | [9]  |
| CIP A181   | <i>P. agglomerans</i> | France        | Human               | Blood                       | Clinical      |                                                                      |      |
| CPA-2      | <i>P. agglomerans</i> | Spain         | <i>Malus</i> sp.    | Apple surface               | Biocontrol    |                                                                      | [10] |
| E325       | <i>P. agglomerans</i> | United States | Apple tree          | Blossoms                    | Biocontrol    | BloomTime™                                                           | [11] |
| Eh1087     | <i>P. agglomerans</i> | New Zealand   | Apple tree          | Blossom                     | Biocontrol    | Produces phenazine                                                   | [12] |
| Eh239      | <i>P. agglomerans</i> | United States | Barley plant        | Kernels                     | Biocontrol    |                                                                      | [13] |
| Eh252      | <i>P. agglomerans</i> | United States | <i>Malus pumila</i> | -                           | Biocontrol    |                                                                      | [14] |
| Eh318      | <i>P. agglomerans</i> | United States | Apple tree          | Stem                        | Biocontrol    |                                                                      | [15] |
| Eh454      | <i>P. agglomerans</i> | United States | Barley plant        | Kernels                     | Biocontrol    |                                                                      | [13] |

|                       |                       |                |                         |                         |               |                                                                 |      |
|-----------------------|-----------------------|----------------|-------------------------|-------------------------|---------------|-----------------------------------------------------------------|------|
| Eh460                 | <i>P. agglomerans</i> | United States  | Barley plant            | Kernels                 | Biocontrol    |                                                                 | [13] |
| EM13cb                | <i>P. agglomerans</i> | Spain          | Human                   | Blood                   | Clinical      |                                                                 |      |
| EM15cb                | <i>P. agglomerans</i> | Spain          | Human                   | Catheter                | Clinical      |                                                                 |      |
| EM17cb                | <i>P. agglomerans</i> | Spain          | Human                   | Blood                   | Clinical      |                                                                 |      |
| EM21cb                | <i>P. agglomerans</i> | Spain          | Human                   | Bile                    | Clinical      |                                                                 |      |
| EM22cb                | <i>P. agglomerans</i> | Spain          | Human                   | Blood                   | Clinical      |                                                                 |      |
| EM2cb                 | <i>P. agglomerans</i> | Spain          | Human                   | Urine                   | Clinical      |                                                                 |      |
| EPS486                | <i>P. agglomerans</i> | Spain          | Apple tree              | Bud                     | Environmental |                                                                 |      |
| EPS595                | <i>P. agglomerans</i> | Spain          | Pear tree               | Bud                     | Environmental |                                                                 |      |
| EPS125                | <i>P. agglomerans</i> | Spain          | Pear tree               | Fruit                   | Biocontrol    |                                                                 | [16] |
| LMG 1286 <sup>T</sup> | <i>P. agglomerans</i> | Zimbabwe       | Human                   | Knee laceration         | Clinical      | Type strain: ATCC 27155 <sup>T</sup> ,<br>CECT 850 <sup>T</sup> | [17] |
| LMG 2557              | <i>P. agglomerans</i> | United Kingdom | <i>Pyrus communis</i>   | -                       | Environmental | NCPPB 1269                                                      |      |
| LMG 2595              | <i>P. agglomerans</i> | South Africa   | <i>Allium cepa</i>      | Necrotic stalk and leaf | Environmental |                                                                 |      |
| LMG 2941              | <i>P. agglomerans</i> | N/A            | <i>Malus sylvestris</i> | Leaf surface            | Environmental |                                                                 |      |
| P10c                  | <i>P. agglomerans</i> | New Zealand    | Apple                   | Flower                  | Biocontrol    | BlossomBless <sup>TM</sup>                                      | [18] |
| P10Qld                | <i>P. agglomerans</i> | Australia      | Wheat plant             | Roots                   | Environmental | QC1.38                                                          |      |
| P1SA                  | <i>P. agglomerans</i> | Australia      | Wheat plant             | Roots                   | Environmental | PGP1.TCV14.2                                                    |      |
| P2SA                  | <i>P. agglomerans</i> | Australia      | Wheat plant             | Roots                   | Environmental | PGP1.TCV14.6                                                    |      |
| P3SA                  | <i>P. agglomerans</i> | Australia      | Wheat plant             | Roots                   | Environmental | SAwow11ct.3                                                     |      |
| P4SA                  | <i>P. agglomerans</i> | Australia      | Wheat plant             | Roots                   | Environmental | SHj20.23                                                        |      |
| P5WA                  | <i>P. agglomerans</i> | Australia      | Wheat plant             | Roots                   | Environmental | WMRst146.26                                                     |      |
| P6WA                  | <i>P. agglomerans</i> | Australia      | Wheat plant             | Roots                   | Environmental | WLs185.22                                                       |      |
| P7NSW                 | <i>P. agglomerans</i> | Australia      | Wheat plant             | Roots                   | Environmental | NMcc14.5                                                        |      |
| P8SA                  | <i>P. agglomerans</i> | Australia      | Wheat plant             | Roots                   | Environmental | SAP2ww1.186                                                     |      |
| P9Qld                 | <i>P. agglomerans</i> | Australia      | Wheat plant             | Roots                   | Environmental | QB1.20                                                          |      |
| SC-1                  | <i>P. agglomerans</i> | United States  | Cotton plant            | -                       | Phytopathogen |                                                                 | [19] |

|                        |                                                  |               |                                                   |               |               |                                    |          |
|------------------------|--------------------------------------------------|---------------|---------------------------------------------------|---------------|---------------|------------------------------------|----------|
| VA21971                | <i>P. agglomerans</i>                            | Switzerland   | Human                                             | Arm wound     | Clinical      |                                    |          |
| ATCC 43348             | <i>P. agglomerans</i> pv.<br><i>gypsophilae</i>  | United States | <i>Gypsophila</i><br><i>paniculata</i>            | Plant gall    | Phytopathogen | Crown gall disease                 | [20]     |
| LMG 20103              | <i>P. ananatis</i>                               | South Africa  | Eucalyptus tree                                   | -             | Phytopathogen |                                    |          |
| LMG 2665 <sup>T</sup>  | <i>P. ananatis</i>                               | Brazil        | <i>Ananas comosus</i>                             | -             | Phytopathogen | Type strain                        | [21]     |
| LMG 2676               | <i>P. ananatis</i>                               | United States | <i>Puccinia graminis</i><br>f. sp. <i>tritici</i> | Uredia        | Phytopathogen |                                    | [22]     |
| LMG 5342               | <i>P. ananatis</i>                               | United States | Human                                             | -             | Clinical      | <i>P. ananatis</i> ATCC 29920      | [21]     |
| LMG 23359              | <i>P. citrea</i>                                 | Philippines   | Pineapple plant                                   | -             | Environmental |                                    | [23]     |
| LMG 2603               | <i>P. dispersa</i>                               | Japan         | Soil                                              | -             | Environmental |                                    | [17]     |
| LMG 2605               | <i>P. dispersa</i>                               | Tanzania      | <i>Vigna unguiculata</i>                          | Seed          | Environmental |                                    |          |
| LMG 2770               | <i>P. dispersa</i>                               | United States | Human                                             | Blood culture | Clinical      |                                    |          |
| LMG 22097              | <i>P. punctata</i>                               | Japan         | Orange tree                                       |               | Environmental |                                    | [23]     |
| CFBP 3614 <sup>T</sup> | <i>P. stewartii</i> subsp.<br><i>indologenes</i> | India         | <i>Setaria italica</i>                            | Leaf spot     | Phytopathogen | Type strain, LMG 2632 <sup>T</sup> | [21, 24] |
| CFBP 3517 <sup>T</sup> | <i>P. stewartii</i> subsp.<br><i>stewartii</i>   | United States | <i>Zea mays</i> var.<br><i>rugosa</i>             | -             | Phytopathogen | Type strain, LMG 2715 <sup>T</sup> | [21, 24] |
| DC283                  | <i>P. stewartii</i> subsp.<br><i>stewartii</i>   | United States | <i>Zea mays</i> var.<br><i>rugosa</i>             | -             | Phytopathogen |                                    | [25]     |
| CFBP 6632              | <i>Pantoea oleae</i>                             | Spain         | <i>Olea europaea</i>                              | Plant gall    | Phytopathogen | Olive knot disease                 |          |
| LMG 5343               | <i>Pantoea</i> sp.                               | United States | Human                                             | -             | Clinical      | <i>P. agglomerans</i> ATCC 29921   |          |

---

## References

1. Wilson EE, Starr MP, Berger JA: **Bark canker, a bacterial disease of the Persian walnut tree.** *Phytopathology* 1957, **47**:669-673.
2. Wilson EE, Zeitoun FM, Fredrickson DL: **Bacterial phloem canker, a new disease of Persian walnut trees.** *Phytopathology* 1967, **57**:618-621.
3. Schonheyder HC, Jensen KT, Frederiksen W: **Taxonomic notes: synonymy of *Enterobacter cancerogenus* (Urosevic 1966) Dickey and Zumoff 1988 and *Enterobacter taylorae* Farmer et al. 1985 and resolution of an ambiguity in the biochemical profile.** *Int J Syst Bacteriol* 1994, **44**:586-587.
4. Billing E, Baker LAE, Crosse JE, Garrett CME: **Characteristics of english isolates of *Erwinia amylovora* (Burrill) Winsow et al.** *J Appl Microbiol* 1961, **24**(2):195-211.
5. Kim WS, Gardan L, Rhim SL, Geider K: ***Erwinia pyrifoliae* sp. nov., a novel pathogen that affects Asian pear trees (*Pyrus pyrifolia* Nakai).** *Int J Syst Bacteriol* 1999, **49**:899-906.
6. Bogdanove AJ, Bauer DW, Beer SV: ***Erwinia amylovora* secretes DspE, a pathogenicity factor and functional AvrE homolog, through the Hrp (type III secretion) pathway.** *J Bacteriol* 1998, **180**:2244–2247.
7. Bocsanczy AM, Beer SV, Perna NT, Biehl B, Glasner JD, Cartinhour SW, Schneider DJ, DeClerck GA, Sebahia M, Parkhill J *et al*: **Contributions of the genome sequence of *Erwinia amylovora* to the fire blight community.** *Acta Hort* 2008, **793**:163-170.
8. Ishimaru CA, Klos EJ, Brubaker RR: **Multiple antibiotic production by *Erwinia herbicola*.** *Phytopathology* 1988, **78**:746-750.
9. Kwon S-W, Go S-J, Kang H-W, Ryu J-C, Jo J-K: **Phylogenetic analysis of *Erwinia* species based on 16S rRNA gene sequences.** *Int J Syst Bacteriol* 1997, **47**(4):1061-1067.
10. Nunes C, Usall J, Teixidó N, Fons E, Viñas I: **Post-harvest biological control by *Pantoea agglomerans* (CPA-2) on Golden Delicious apples.** *J Appl Microbiol* 2002, **92**:247-255.
11. Pusey PL, Stockwell VO, Rudell DR: **Antibiosis and acidification by *Pantoea agglomerans* strain E325 may contribute to suppression of *Erwinia amylovora*.** *Phytopathology* 2008, **98**(10):1136-1143.
12. Kearns LP, Mahanty HK: **Antibiotic production by *Erwinia herbicola* Eh1087: its role in inhibition of *Erwinia amylovora* and partial characterization of antibiotic biosynthesis genes.** *Applied and environmental microbiology* 1998, **64**(5):1837-1844.
13. Braun-Kiewnick A, Jacobsen BJ, Sands DC: **Biological control of *Pseudomonas syringae* pv. *syringae*, the causative agent of basal kernel blight of barley, by antagonistic *Pantoea agglomerans*.** *Phytopathology* 2000, **90**:368-375.
14. Vanneste JL, Yu J, Beer SV: **Role of antibiotic production by *Erwinia herbicola* Eh252 in biological control of *Erwinia amylovora*.** *J Bacteriol* 1992, **174**(9):2785-2796.
15. Wright SAI, Zumoff CH, Schneider L, Beer SV: ***Pantoea agglomerans* strain EH318 produces two antibiotics that inhibit *Erwinia amylovora* in vitro.** *Applied and environmental microbiology* 2001, **67**(1):284-292.

16. Bonaterra A, Mari M, Casalini L, Montesinos E: **Biological control of *Monilinia laxa* and *Rhizopus stolonifer* in postharvest of stone fruit by *Pantoea agglomerans* EPS125 and putative mechanisms of antagonism.** *Int J Food Microbiol* 2003, **84**:93-104.
17. Gavini F, Mergaert J, Beji A, Mielcarek C, Izard D, Kersters K, De Ley J: **Transfer of *Enterobacter agglomerans* (Beijerinck 1888) Ewing and Fife 1972 to *Pantoea* gen. nov. as *Pantoea agglomerans* comb. nov. and description of *Pantoea dispersa* sp. nov.** *Int J Syst Bacteriol* 1989, **39**(3):337-345.
18. Vanneste JL, Cornish DC, Yu J, Voyle MD: **P10c: a new biological control agent for control of fire blight which can be sprayed or distributed using honey bees.** *Acta Hort* 2002, **590**:231-235.
19. Medrano EG, Bell AA: **Role of *Pantoea agglomerans* in opportunistic bacterial seed and boll rot of cotton (*Gossypium hirsutum*) grown in the field.** *J Appl Microbiol* 2007, **102**:134-143.
20. Cooksey DA: **Galls of *Gypsophila paniculata* caused by *Erwinia herbicola*.** *Plant Dis* 1986, **70**:464-468.
21. Mergaert J, Verdonck L, Kersters K: **Transfer of *Erwinia ananas* (synonym, *Erwinia uredovora*) and *Erwinia stewartii* to the genus *Pantoea* emend. as *Pantoea ananas* (Serrano 1928) comb. nov. and *Pantoea stewartii* (Smith 1898) comb. nov., respectively, and description of *Pantoea stewartii* subsp. *indologenes* subsp. nov.** *Int J Syst Bacteriol* 1993, **43**(1):162-173.
22. Pon DS, Townsend CE, Wessman GE, Schmitt CG, Kingsolver CH: **A *Xanthomonas* parasitic on uredia of cereal rusts.** *Phytopathology* 1954, **44**:707-710.
23. Kageyama B, Nakae M, Yagi S, Sonoyama T: ***Pantoea punctata* sp. nov., *Pantoea citrea* sp. nov., and *Pantoea terrae* sp. nov. isolated from fruit and soil samples.** *Int J Syst Bacteriol* 1992, **42**(2):203-210.
24. Hauben L, Moore ERB, Vauterin L, Steenackers M, Mergaert J, Verdonck L, Swings J: **Phylogenetic position of phytopathogens within the *Enterobacteriaceae*.** *Syst Appl Microbiol* 1998, **21**:384-397.
25. Coplin DL, Rowan RG, Chisholm DA, Whitmoyer RE: **Characterization of plasmids in *Erwinia stewartii*.** *Applied and environmental microbiology* 1981, **42**:599-604.
