# Supplementary material for: Genotypic comparison of Pantoea agglomerans plant and clinical strains
Source: PubMed Central journal article supplement (PMC2764716; doi:10.1186/1471-2180-9-204), 2009-09-22
Supplement: 1471-2180-9-204-S2.pdf [file 1471-2180-9-204-S2.pdf]

**TABLE S2.** BLAST hits obtained from NCBI blastn using 16S rDNA and *gyrB* sequences of representative strains belonging to the different *Enterobacter agglomerans* biotypes defined by Brenner et al. [1].

| Biotype | Strain                | 16S rDNA, best reliable hit(s) <sup>a</sup>                                                                                                                   | Accession                          | % Match                                               | <i>gyrB</i> , best reliable hit(s) <sup>a</sup>                                                             | Accession                             | % Match                                         |
|---------|-----------------------|---------------------------------------------------------------------------------------------------------------------------------------------------------------|------------------------------------|-------------------------------------------------------|-------------------------------------------------------------------------------------------------------------|---------------------------------------|-------------------------------------------------|
| I       | LMG 1286              | <i>Pantoea agglomerans</i> NCTC9381T                                                                                                                          | AJ251466.1                         | 1505/1515 (99%)                                       | <i>Pantoea agglomerans</i> LMG 2554                                                                         | EF988811.1                            | 733/741 (98%)                                   |
| II      | LMG 5345              | <i>Erwinia tasmaniensis</i> ET1/99                                                                                                                            | CU468135.1                         | 1438/1471 (97%)                                       | <i>Pantoea</i> sp. LMG 24200<br><i>Enterobacter sakazakii</i> BAA-894<br><i>Erwinia tasmaniensis</i> ET1/99 | EF988770.1<br>CP000783.1<br>NC_010694 | 664/745 (89%)<br>654/746 (87%)<br>629/740 (85%) |
| III     | LMG 2605              | <i>Pantoea dispersa</i> GTC 1472                                                                                                                              | AB273743.1                         | 1460/1465 (99%)                                       | <i>Pantoea dispersa</i> LMG 2603                                                                            | EF988818.1                            | 730/740 (98%)                                   |
| IV      | ATCC 27998            | <i>Erwinia soli</i> Ew02<br><i>Erwinia tasmaniensis</i> strain ET1/99                                                                                         | EF540891.1<br>CU468135.1           | 1404/1423 (98%)<br>1425/1470 (96%)                    | <i>Salmonella enterica</i> subsp. <i>enterica</i> sv.<br>Schwarzengrund CVM19633                            | CP001127.1                            | 628/724 (86%)                                   |
| V       | LMG 5343              | <i>Pantoea agglomerans</i> LMG 2565                                                                                                                           | AF373196                           | 1448/1476 (98%)                                       | <i>Pantoea agglomerans</i> LMG 2565                                                                         | EF988814.1                            | 674/744 (90%)                                   |
| VI      | LMG 5342              | <i>Pantoea ananatis</i> LMG 2665                                                                                                                              | Z96081                             | 1343/1362 (98%)                                       | <i>Pantoea ananatis</i> LMG 2665                                                                            | EF988824.1                            | 738/740 (99%)                                   |
| VII     | LMG 5336              | <i>Enterobacter</i> sp. 638                                                                                                                                   | CP000653                           | 1442/1464 (98%)                                       | <i>Enterobacter cloacae</i> ATCC 13047<br><i>Citrobacter koseri</i> ATCC BAA-895                            | AB084011.1<br>CP000822.1              | 674/724 (93%)<br>661/722 (91%)                  |
| VIII    | LMG 5341              | <i>Erwinia persicinus</i>                                                                                                                                     | AJ001190.1                         | 1457/1464 (99%)                                       | <i>Erwinia pyrifoliae</i> DSM12163                                                                          | AB242885.1                            | 672/740 (90%)                                   |
| IX      | ATCC 29918            | <i>Escherichia hermannii</i> GTC 347<br><i>Salmonella typhimurium</i> LT2                                                                                     | AB273738.1<br>AE008706.1           | 1451/1468 (98%)<br>1443/1467 (98%)                    | <i>Salmonella enterica</i> subsp. <i>enterica</i> sv.<br>Heidelberg SL476                                   | CP001120.1                            | 668/737 (90%)                                   |
| X       | LMG 5339              | <i>Buttiauxella agrestis</i> DSM 4586                                                                                                                         | AJ233400.1                         | 1442/1449 (99%)                                       | <i>Enterobacter sakazakii</i> ATCC BAA-894                                                                  | CP000783.1                            | 689/815 (84%)                                   |
| XI      | LMG 5338 <sup>b</sup> | -                                                                                                                                                             | -                                  | -                                                     | -                                                                                                           | -                                     | -                                               |
| XII     | LMG 5337              | <i>Klebsiella pneumoniae</i> MGH 78578<br><i>Citrobacter koseri</i> ATCC BAA-895<br><i>Salmonella enterica</i> subsp. <i>enterica</i><br>sv. Heidelberg SL476 | CP000647.1<br>CP000822<br>CP001120 | 1424/1466 (97%)<br>1421/1465 (96%)<br>1420/1466 (96%) | <i>Citrobacter koseri</i> ATCC BAA-895<br><i>Salmonella enterica</i> subsp. <i>arizonae</i>                 | CP000822.1<br>CP000880.1              | 674/743 (90%)<br>663/729 (90%)                  |
| XIII    | EL107 <sup>c</sup>    | <i>Pantoea agglomerans</i> LMG 2565                                                                                                                           | AF373196.1                         | 1466/1477 (99%)                                       |                                                                                                             |                                       |                                                 |

<sup>a</sup> Self-hits are excluded, only hits to established strains with accepted species name were considered. Hits complete sequenced organisms were preferred.

<sup>b</sup> No sequence available, but according to Tamura et al. [2] strains of biotype XI belongs to *Leclercia adecarboxylata*.

<sup>c</sup> 16S rDNA sequence of *P. agglomerans* EL107 was retrieved in the NCBI database under accession number FJ357815.

## References

1. Brenner DJ, Fanning GR, Leete Knutson JK, Steigerwalt AG, Krichevsky MI: **Attempts to classify Herbicola group-*Enterobacter agglomerans* strains by deoxyribonucleic acid hybridization and phenotypic tests.** *Int J Syst Bacteriol* 1984, **34**(1):45-55.
2. Tamura K, Sakazaki R, Kosako Y, Yoshizaki E: ***Leclercia adecarboxylata* gen. nov., comb. nov., formerly known as *Escherichia adecarboxylata*.** *Curr Microbiol* 1986, **13**:179-184.
